# Supplementary material for: Contribution of RND-Type Efflux Pumps in Reduced Susceptibility to Biocides in Acinetobacter baumannii
Source: MDPI journal article supplement (doi:10.3390/antibiotics11111635), 2022-11-16
Supplement: s1 [file s1]

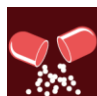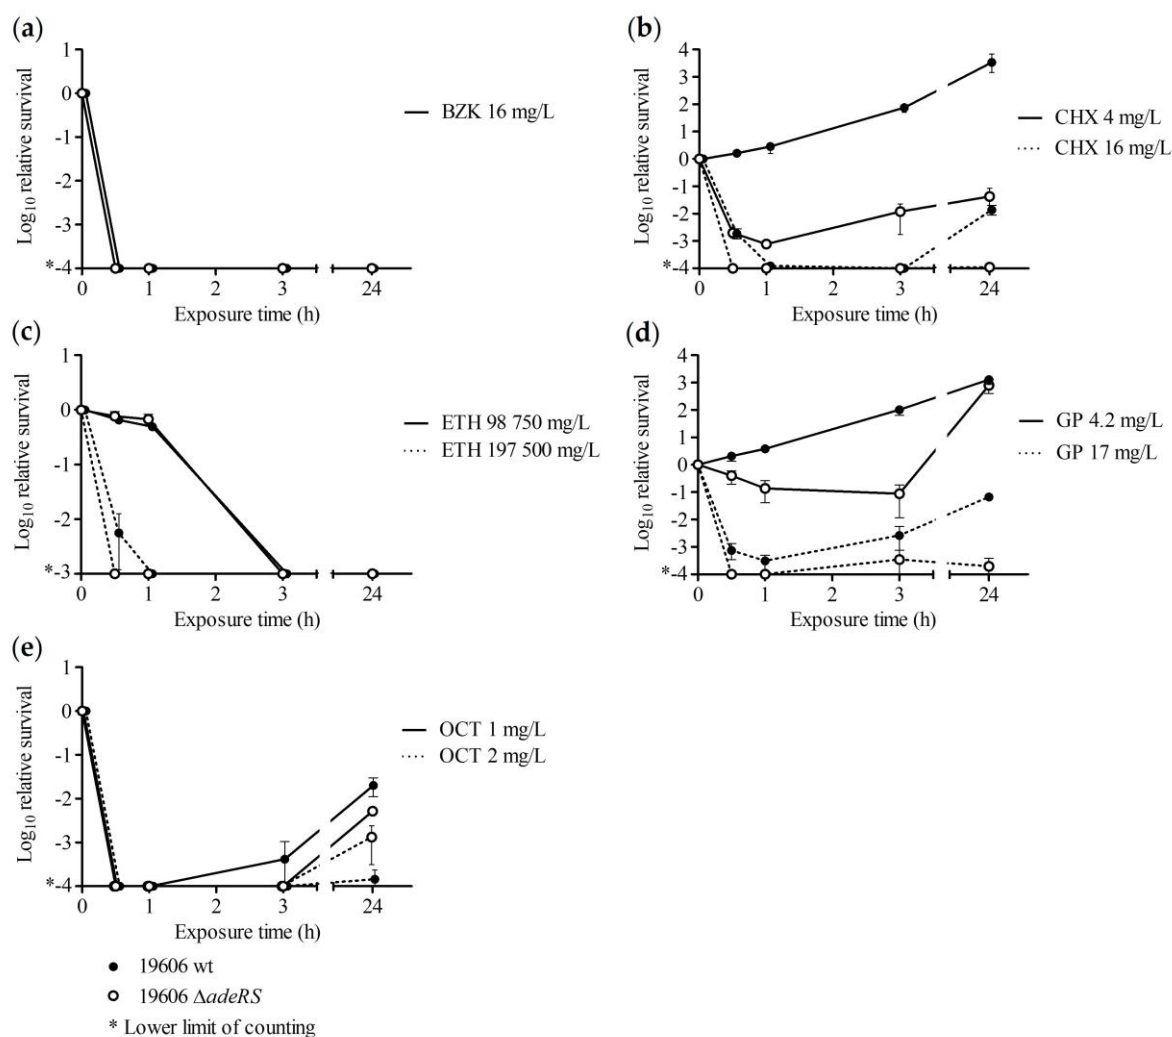

**Figure S1.** Time-kill curves for *A. baumannii* ATCC 19606 wt and 19606  $\Delta adeRS$  (*adeABC* not expressed) with additional biocide concentrations: (a) Benzalkonium chloride (BZK), (b) Chlorhexidine digluconate (CHX), (c) Glucoprotamin (GP), (d) Ethanol (ETH), (e) Octenidine dihydrochloride (OCT). Error bars represent the range from three independent experiments.

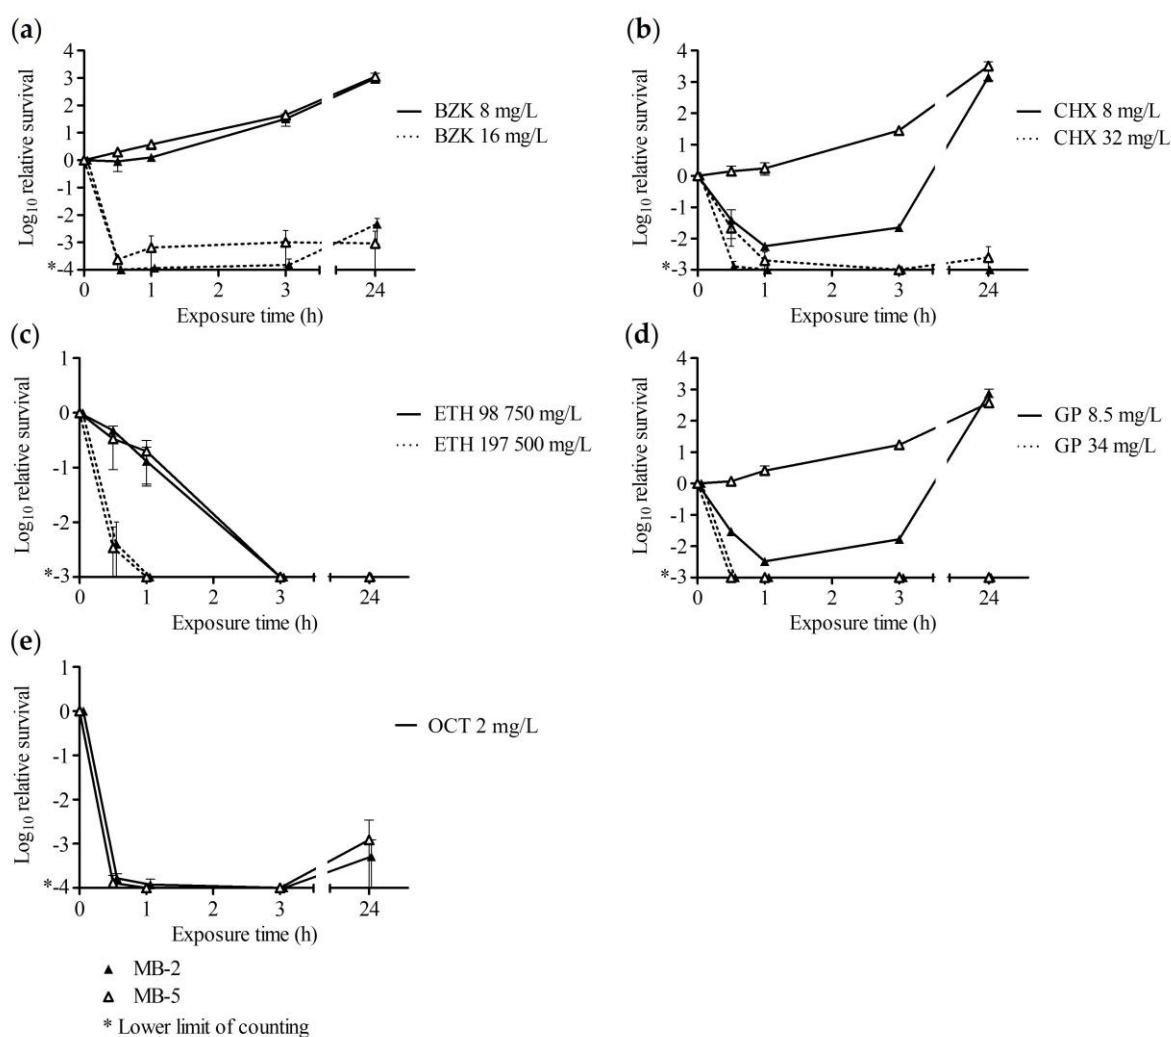

**Figure S2.** Time-kill curves for *A. baumannii* MB-2 and MB-5 (*adeABC* overexpressed) with remaining biocide concentrations: (a) BZK, (b) CHX, (c) GP, (d) ETH, (e) OCT. Error bars represent the range from three independent experiments.

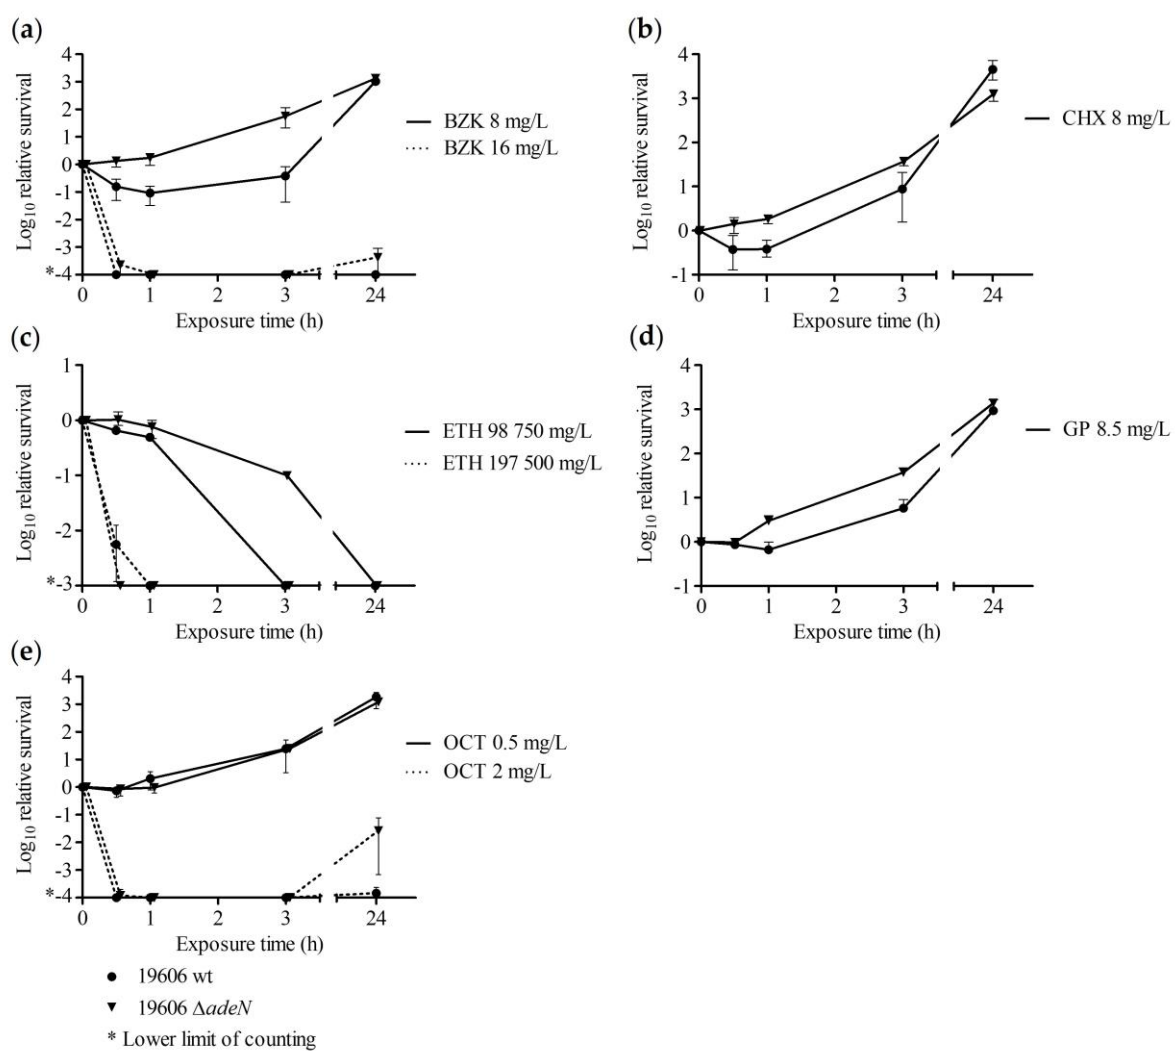

**Figure S3.** Time-kill curves for *A. baumannii* ATCC 19606 wt and 19606  $\Delta\text{adeN}$  (*adeIJK* overexpressed) with additional biocide concentrations: (a) BZK, (b) CHX, (c) GP, (d) ETH, (e) OCT. Error bars represent the range from three independent experiments.

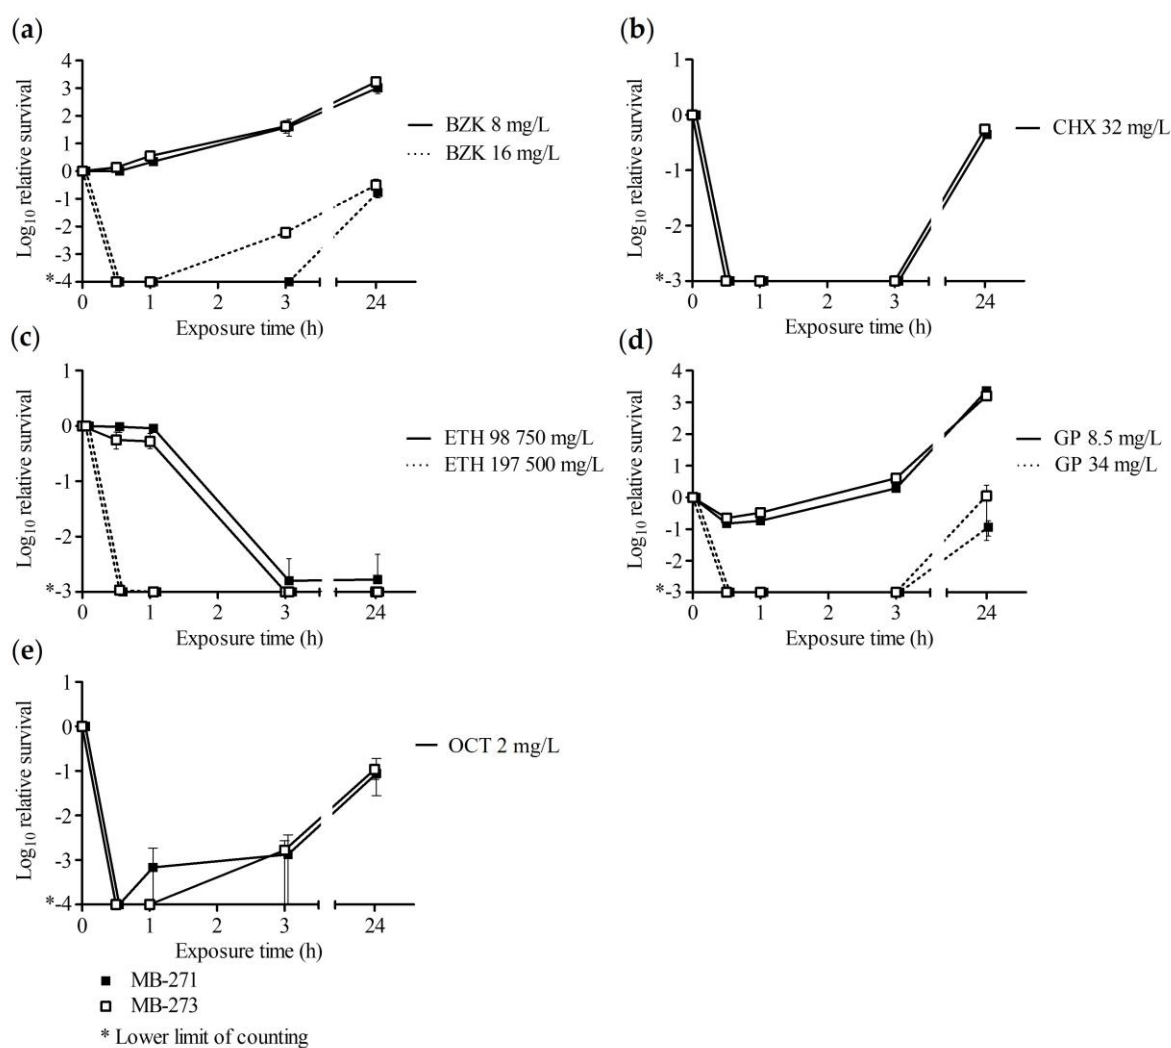

**Figure S4.** Time-kill curves for *A. baumannii* MB-271 and MB-273 (*adeIJK* overexpressed) with remaining biocide concentrations: (a) BZK, (b) CHX, (c) GP, (d) ETH, (e) OCT. Error bars represent the range from three independent experiments.

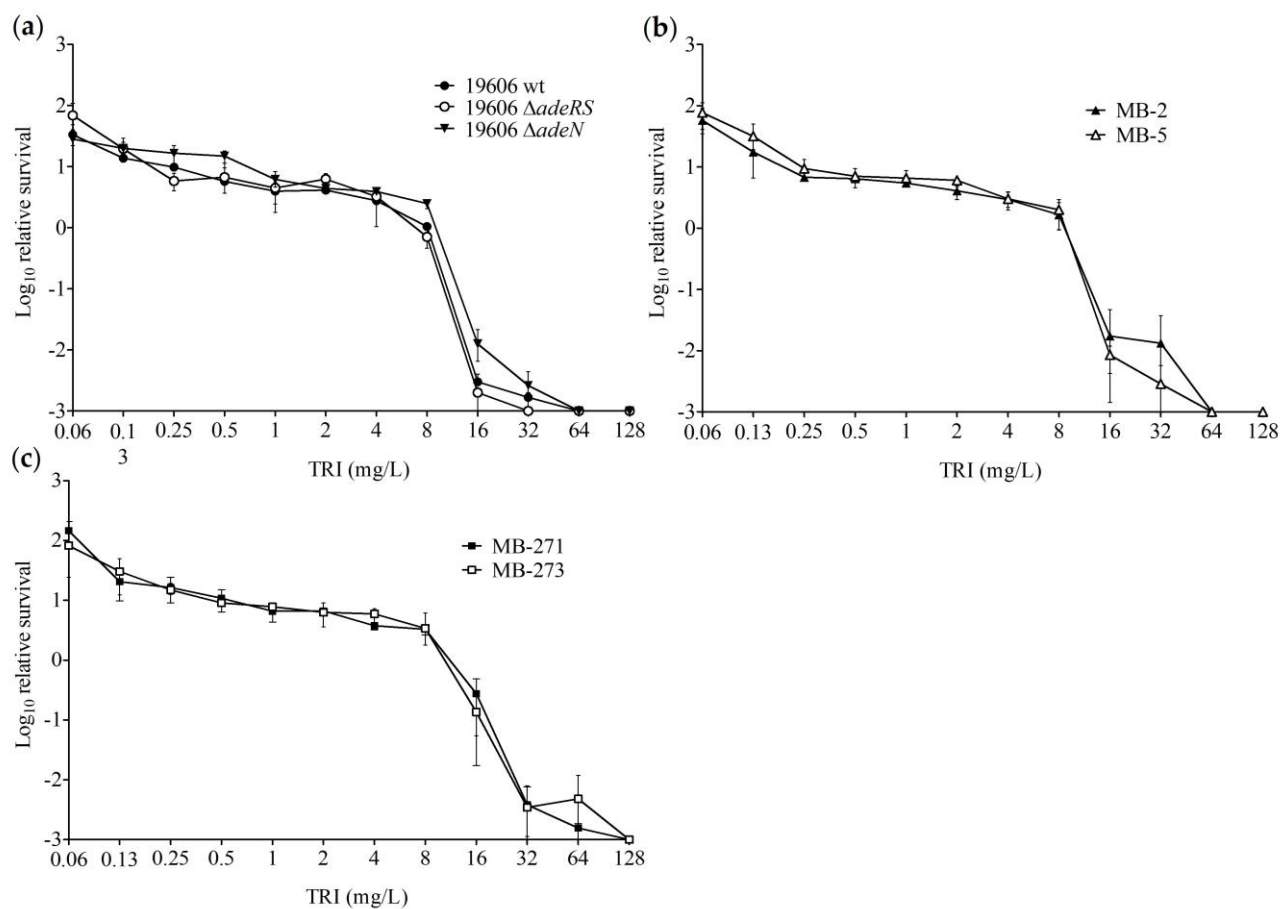

**Figure S5.** Dose response of *A. baumannii* regulatory system mutant strains to triclosan (TRI): (a) for *A. baumannii* ATCC 19606, *A. baumannii* ATCC 19606  $\Delta\text{adeRS}$  and *A. baumannii* ATCC 19606  $\Delta\text{adeN}$ , (b) for *A. baumannii* MB-2 and *A. baumannii* MB-5, (c) for *A. baumannii* MB-271 and *A. baumannii* MB-273. Error bars represent the range from three independent experiments.

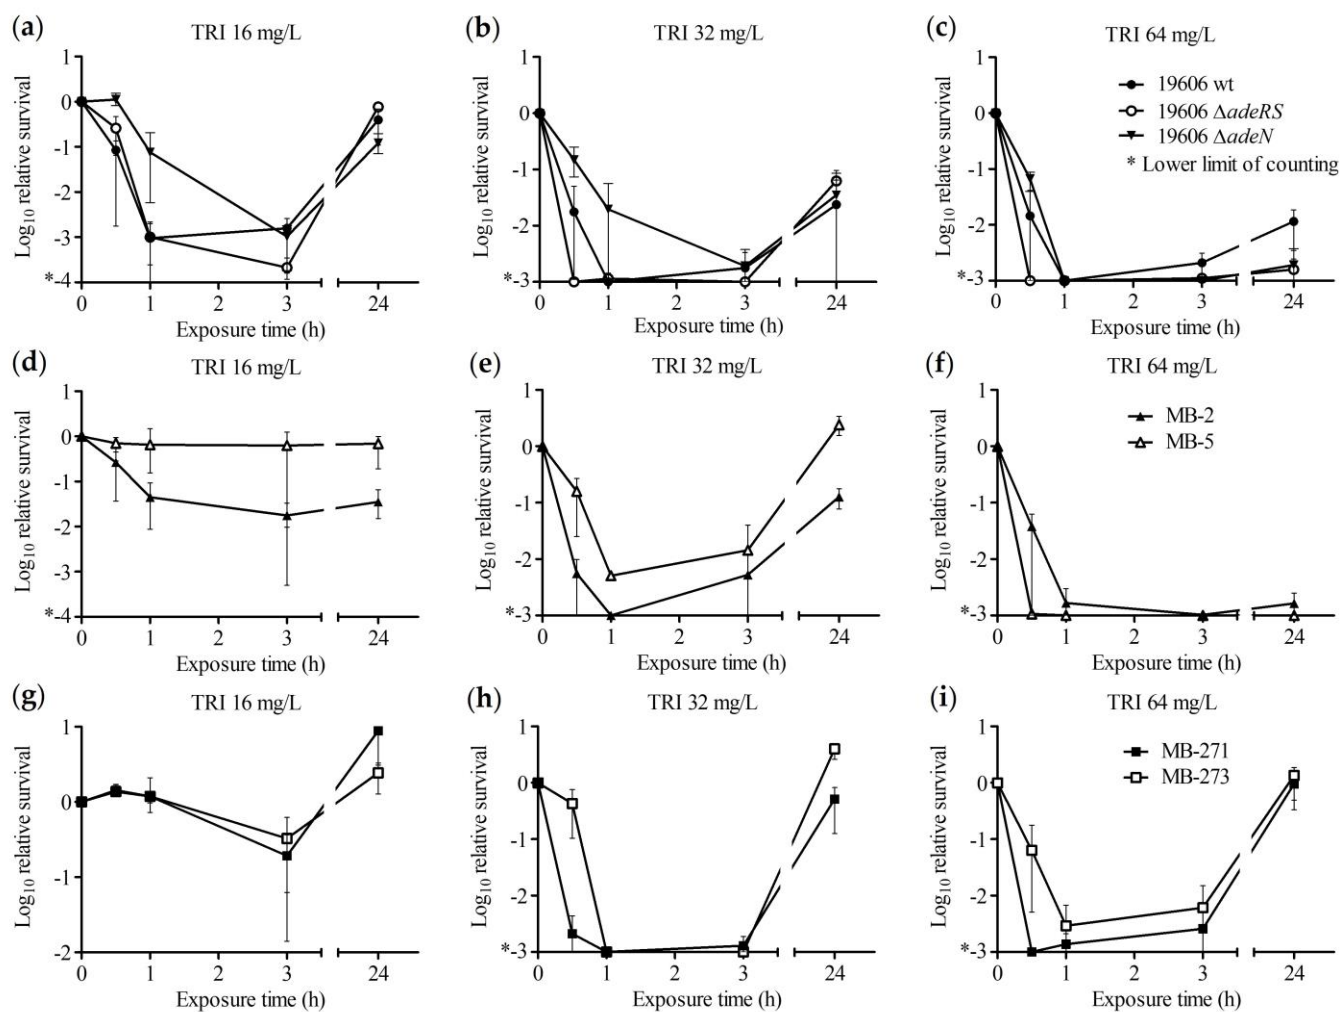

**Figure S6.** Time-kill curves with different TRI concentrations: (a) – (c) for *A. baumannii* ATCC 19606, *A. baumannii* ATCC 19606  $\Delta adeRS$  and *A. baumannii* ATCC 19606  $\Delta adeN$ , (d) – (f) for *A. baumannii* MB-2 and *A. baumannii* MB-5, (g) – (i) for *A. baumannii* MB-271 and *A. baumannii* MB-273. Error bars represent the range from three independent experiments. \* Lower limit of counting.
